# Supplementary material for: STAT3 is constitutively activated in chronic active Epstein-Barr virus infection and can be a therapeutic target
Source: PubMed Central journal article supplement (PMC6089567; doi:10.18632/oncotarget.25780), 2018-07-24
Supplement: oncotarget-09-31077-s001.pdf [file oncotarget-09-31077-s001.pdf]

## STAT3 is constitutively activated in chronic active Epstein-Barr virus infection and can be a therapeutic target

### SUPPLEMENTARY MATERIALS

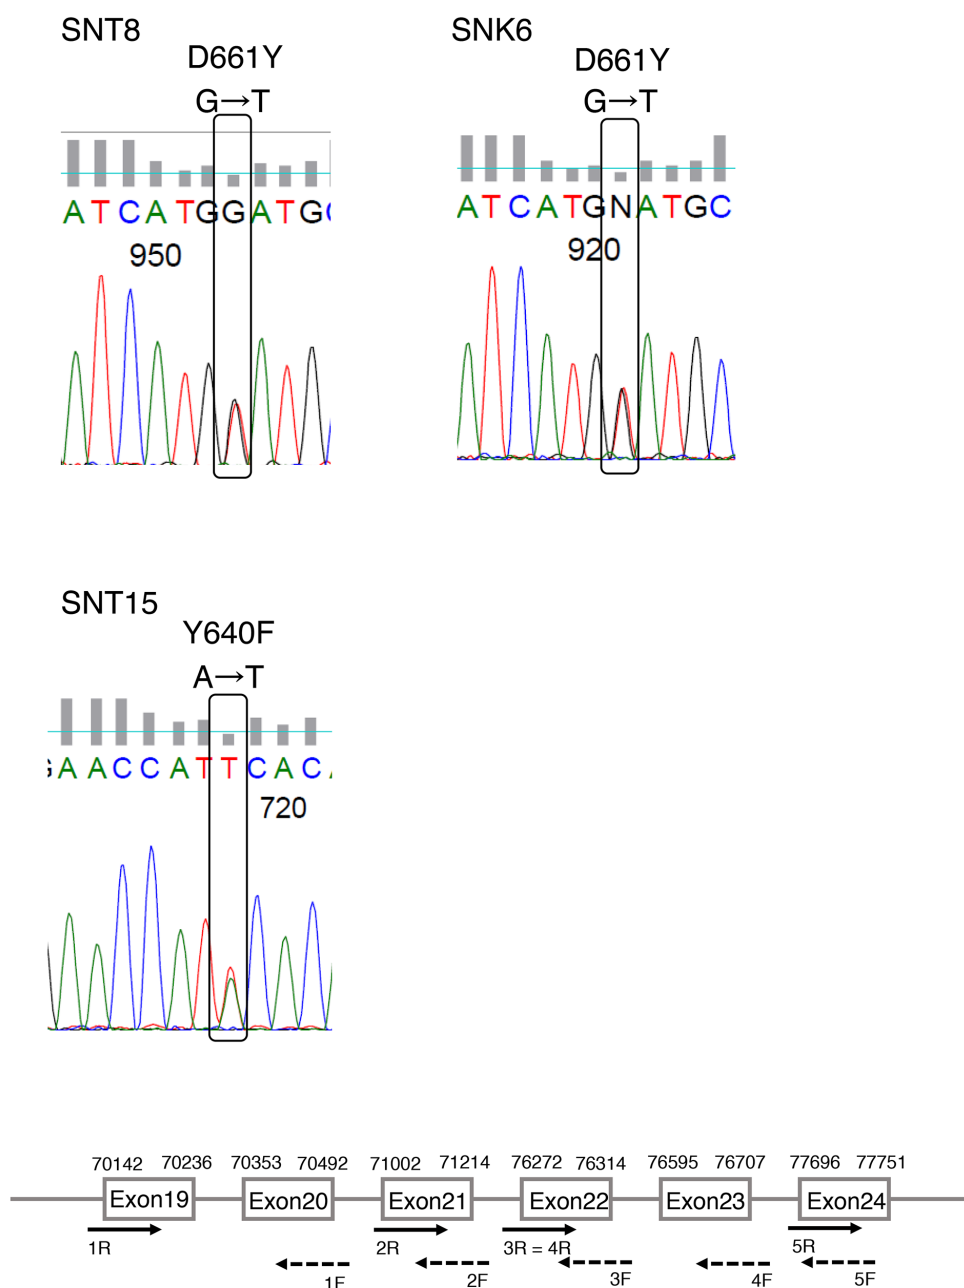

**Supplementary Figure 1: Sequencing of the *STAT3* Src homology 2 (SH2) domain of 6 cell lines and 12 patients with CAEBV. SNT8 and SNK6 demonstrated D661Y mutation and SNT15 exhibited Y640F mutation. CAEBV cases did not reveal any *STAT3* SH2 domain mutations.**

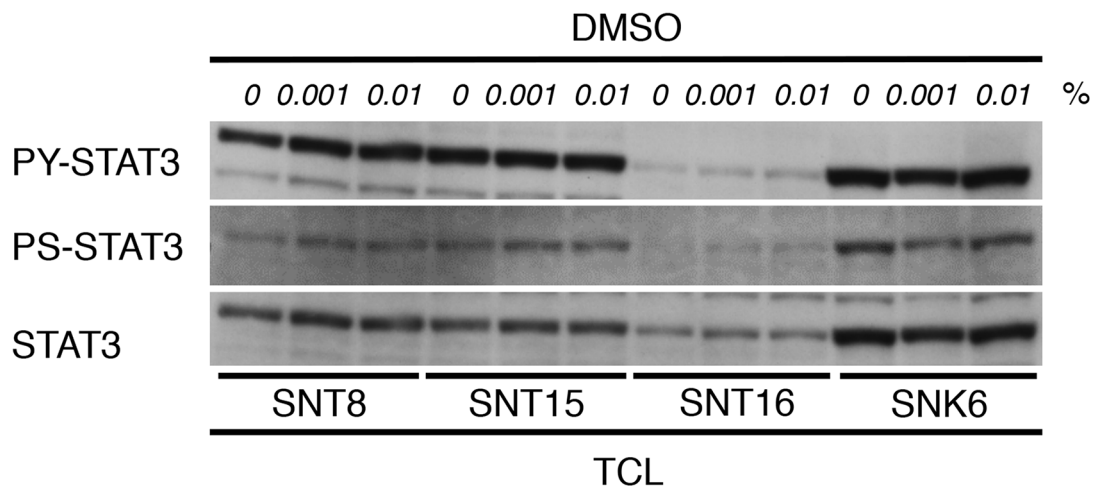

**Supplementary Figure 2: Four cell lines were treated with DMSO at the identical concentration of the inhibitors.** The phosphorylation of tyrosine-705 and serine-727 were not downregulated by the treatment.

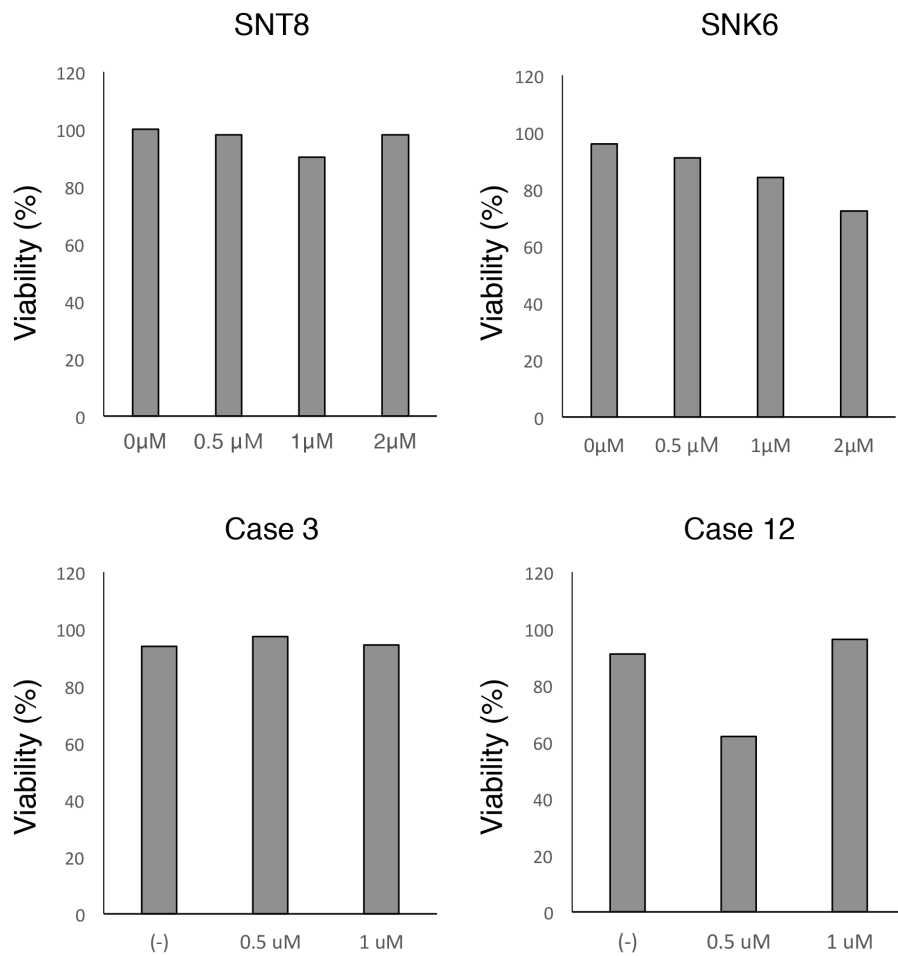

**Supplementary Figure 3: The viability for the cells of Figure 5.**
